# Supplementary material for: Genome-wide association study of glioma and meta-analysis
Source: Springer Nature journal article supplement (doi:10.1007/s00439-012-1212-0), 2012-08-10
Supplement: MOESM1 [file 439_2012_1212_MOESM1_ESM.doc]

**Supplementary Table 1. Characterization of glioma subtypes for studies included in GliomaScan**

| **Study** | **Total cases** | **Total cases, known histology** | **Low grade glioma**  **(I or II)a** | **High grade glioma**  **(II or IV)** | **Other** | **Glioblastoma** | **Oligodendro-glioma** |
| --- | --- | --- | --- | --- | --- | --- | --- |
| ATBC | 37 | 32 | 4 (12.5) | 6 (18.8) | 22 (68.8) | 6 (18.8) | 2 (6.3) |
| AgHealth | 18 | 18 | 3 (16.7) | 14 (77.8) | 1 (5.6) | 12 (66.7) | 3 (16.7) |
| CLUEII | 36 | 36 | 4 (11.1) | 28 (77.8) | 4 (11.1) | 27 (75.0) | 4 (11.1) |
| CPSII | 54 | 54 | 3 (5.6) | 46 (85.2) | 5 (9.3) | 42 (77.8) | 1 (1.9) |
| HPFS | 26 | 0 | n/a | n/a | n/a | n/a | n/a |
| MCCS | 40 | 40 | 4 (10.0) | 34 (85.0) | 2 (5.0) | 30 (75.0) | 1 (2.5) |
| MEC | 2 | 2 | 0 (0.0) | 2 (100) | 0 (0.0) | 1 (50.0) | 0 (0.0) |
| NHS | 38 | 0 | n/a | n/a | n/a | n/a | n/a |
| NSHDS | 111 | 111 | 30 (27.0) | 76 (68.5) | 5 (4.5) | 47 (42.3) | 14 (12.6) |
| NYU-WHS | 5 | 5 | 1 (20.0) | 3 (60.0) | 1 (20.0) | 3 (60.0) | 1 (20.0) |
| PHSI | 16 | 16 | 2 (12.5) | 14 (87.5) | 0 (0.0) | 13 (81.3) | 0 (0.0) |
| PLCO | 132 | 107 | 9 (8.4) | 88 (82.2) | 10 (9.3) | 83 (77.6) | 3 (2.8) |
| VITAL | 33 | 33 | 3 (9.1) | 28 (84.8) | 2 (6.1) | 26 (78.8) | 2 (6.1) |
| WHS | 8 | 8 | 2 (25.0) | 6 (75.0) | 0 (0.0) | 6 (75.0) | 0 (0.0) |
| Gliogene | 401 | 400 | 64 (16.0) | 278 (69.5) | 58 (14.5) | 237 (59.3) | 71 (17.8) |
| Interphone | 277 | 277 | 66 (23.8) | 176 (63.5) | 35 (12.6) | 140 (50.5) | 40 (14.4) |
| NCI_BTS | 322 | 322 | 68 (21.1) | 216 (67.1) | 38 (11.8) | 160 (49.7) | 57 (17.7) |
| NIOSH_AGCC | 300 | 300 | 90 (30.0) | 168 (56.0) | 42 (14.0) | 138 (46.0) | 63 (21.0) |
| **Total cohort** | **556** | **462** | **65 (14.1)** | **345 (74.7)** | **52 (11.3)** | **296 (64.1)** | **31 (6.7)** |
| **Total case-cont** | **1300** | **1299** | **288 (22.2)** | **838 (64.5)** | **173 (13.3)** | **675 (52.0)** | **231 (17.8)** |
| **ALL STUDIES** | **1856** | **1761** | **353 (20.0)** | **1183 (67.2)** | **225 (12.8)** | **971 (55.1)** | **262 (14.9)** |

a Percentage of total with known histology in parentheses

**Supplementary Table 2. Risk estimates for Glioma for 85 loci identified in current GliomaScan set with p-trend ≤ 4.0 x 10-4 in combined genome-wide association studies (GWAS) and replication analysis**

| LOCUS | CHR | LOCATION | GENE | GROUP | OR | 95% CI | P | P heterog. |
| --- | --- | --- | --- | --- | --- | --- | --- | --- |
| rs3828783 | 6 | 33875705 | LEMD2,MLN | Gliomascan | 1.28 | (1.15-1.43) | 7.94E-06 |  |
| rs3828783 | 6 | 33875705 | LEMD2,MLN | US-Mayo | 1.02 | (0.69-1.52) | 9.07E-01 |  |
| rs3828783 | 6 | 33875705 | LEMD2,MLN | ALL | 1.26 | (1.14-1.41) | 1.52E-05 | 2.79E-01 |
|  |  |  |  |  |  |  |  |  |
| rs2924634 | 15 | 66876869 | ANP32A,LOC100128146,C15orf28 | Gliomascan | 0.64 | (0.51-0.79) | 6.20E-05 |  |
| rs2924634 | 15 | 66876869 | ANP32A,LOC100128146,C15orf28 | US-Mayo | 0.5 | (0.23-1.10) | 8.45E-02 |  |
| rs2924634 | 15 | 66876869 | ANP32A,LOC100128146,C15orf28 | ALL | 0.62 | (0.50-0.77) | 1.68E-05 | 5.69E-01 |
|  |  |  |  |  |  |  |  |  |
| rs1538583 | 9 | 70981367 | TJP2 | Gliomascan | 1.26 | (1.13-1.40) | 1.39E-05 |  |
| rs1538583 | 9 | 70981367 | TJP2 | US-Mayo | 0.95 | (0.64-1.41) | 7.85E-01 |  |
| rs1538583 | 9 | 70981367 | TJP2 | ALL | 1.24 | (1.12-1.37) | 3.69E-05 | 1.72E-01 |
|  |  |  |  |  |  |  |  |  |
| rs180628 | 10 | 117763032 |  | Gliomascan | 0.82 | (0.74-0.91) | 1.24E-04 |  |
| rs180628 | 10 | 117763032 |  | FRE | 0.89 | (0.78-1.01) | 9.53E-02 |  |
| rs180628 | 10 | 117763032 |  | GER | 0.94 | (0.81-1.08) | 2.23E-01 |  |
| rs180628 | 10 | 117763032 |  | US-MDA | 0.96 | (0.85-1.08) | 4.08E-01 |  |
| rs180628 | 10 | 117763032 |  | UK | 0.89 | (0.77-1.03) | 1.04E-01 |  |
| rs180628 | 10 | 117763032 |  | US-UCSF | 0.95 | (0.83-1.08) | 4.22E-01 |  |
| rs180628 | 10 | 117763032 |  | US-Mayo | 1.32 | (0.91-1.94) | 1.46E-01 |  |
| rs180628 | 10 | 117763032 |  | ALL | 0.9 | (0.86-0.95) | 9.94E-05 | 1.56E-01 |
|  |  |  |  |  |  |  |  |  |
| rs2955174 | 4 | 55338161 |  | Gliomascan | 1.45 | (1.20-1.74) | 8.40E-05 |  |
| rs2955174 | 4 | 55338161 |  | US-Mayo | 1.12 | (0.60-2.08) | 7.31E-01 |  |
| rs2955174 | 4 | 55338161 |  | ALL | 1.42 | (1.19-1.69) | 1.17E-04 | 4.32E-01 |
|  |  |  |  |  |  |  |  |  |
| rs10970502 | 9 | 31704812 |  | Gliomascan | 0.65 | (0.54-0.79) | 1.12E-05 |  |
| rs10970502 | 9 | 31704812 |  | US-Mayo | 1.73 | (0.84-3.57) | 1.38E-01 |  |
| rs10970502 | 9 | 31704812 |  | ALL | 0.7 | (0.58-0.84) | 1.20E-04 | 1.08E-02 |
|  |  |  |  |  |  |  |  |  |
| rs9541702 | 13 | 68478287 |  | Gliomascan | 0.78 | (0.69-0.89) | 1.33E-04 |  |
| rs9541702 | 13 | 68478287 |  | FRE | 0.86 | (0.72-1.02) | 3.37E-02 |  |
| rs9541702 | 13 | 68478287 |  | GER | 1 | (0.83-1.21) | 4.12E-01 |  |
| rs9541702 | 13 | 68478287 |  | US-MDA | 0.84 | (0.72-0.98) | 1.97E-02 |  |
| rs9541702 | 13 | 68478287 |  | UK | 0.97 | (0.81-1.16) | 7.48E-01 |  |
| rs9541702 | 13 | 68478287 |  | US-UCSF | 0.96 | (0.80-1.15) | 6.23E-01 |  |
| rs9541702 | 13 | 68478287 |  | US-Mayo | 1.05 | (0.67-1.65) | 8.25E-01 |  |
| rs9541702 | 13 | 68478287 |  | ALL | 0.88 | (0.82-0.94) | 1.22E-04 | 2.18E-01 |
|  |  |  |  |  |  |  |  |  |
| rs12136115 | 1 | 115568767 |  | Gliomascan | 0.83 | (0.76-0.91) | 5.19E-05 |  |
| rs12136115 | 1 | 115568767 |  | US-Mayo | 1.07 | (0.76-1.51) | 6.92E-01 |  |
| rs12136115 | 1 | 115568767 |  | ALL | 0.84 | (0.77-0.92) | 1.42E-04 | 1.54E-01 |
|  |  |  |  |  |  |  |  |  |
| rs11638968 | 15 | 78815609 | FAM108C1 | Gliomascan | 0.68 | (0.56-0.83) | 1.23E-04 |  |
| rs11638968 | 15 | 78815609 | FAM108C1 | US-Mayo | 0.85 | (0.46-1.58) | 6.13E-01 |  |
| rs11638968 | 15 | 78815609 | FAM108C1 | ALL | 0.7 | (0.58-0.84) | 1.48E-04 | 4.97E-01 |
|  |  |  |  |  |  |  |  |  |
| rs17109268 | 5 | 148396298 | SH3TC2 | Gliomascan | 1.38 | (1.16-1.64) | 2.78E-04 |  |
| rs17109268 | 5 | 148396298 | SH3TC2 | US-Mayo | 1.36 | (0.75-2.47) | 3.17E-01 |  |
| rs17109268 | 5 | 148396298 | SH3TC2 | ALL | 1.38 | (1.17-1.63) | 1.71E-04 | 9.60E-01 |
|  |  |  |  |  |  |  |  |  |
| rs10894696 | 11 | 132934446 |  | Gliomascan | 1.4 | (1.19-1.65) | 5.35E-05 |  |
| rs10894696 | 11 | 132934446 |  | US-Mayo | 0.89 | (0.51-1.55) | 6.73E-01 |  |
| rs10894696 | 11 | 132934446 |  | ALL | 1.35 | (1.15-1.58) | 1.79E-04 | 1.25E-01 |
|  |  |  |  |  |  |  |  |  |
| rs11177955 | 12 | 68587986 | C12orf28 | Gliomascan | 0.68 | (0.56-0.83) | 1.35E-04 |  |
| rs11177955 | 12 | 68587986 | C12orf28 | US-Mayo | 0.91 | (0.40-2.07) | 8.22E-01 |  |
| rs11177955 | 12 | 68587986 | C12orf28 | ALL | 0.69 | (0.57-0.84) | 1.80E-04 | 5.04E-01 |
|  |  |  |  |  |  |  |  |  |
| rs11572172 | 10 | 96787742 | CYP2C8 | Gliomascan | 0.69 | (0.56-0.84) | 2.70E-04 |  |
| rs11572172 | 10 | 96787742 | CYP2C8 | US-Mayo | 0.75 | (0.39-1.47) | 4.09E-01 |  |
| rs11572172 | 10 | 96787742 | CYP2C8 | ALL | 0.69 | (0.57-0.84) | 2.07E-04 | 7.94E-01 |
|  |  |  |  |  |  |  |  |  |
| rs7733480 | 5 | 12695449 |  | Gliomascan | 1.18 | (1.08-1.29) | 1.37E-04 |  |
| rs7733480 | 5 | 12695449 |  | FRE | 1.03 | (0.92-1.15) | 6.90E-01 |  |
| rs7733480 | 5 | 12695449 |  | GER | 1.09 | (0.96-1.23) | 2.82E-01 |  |
| rs7733480 | 5 | 12695449 |  | US-MDA | 1.02 | (0.92-1.13) | 9.76E-01 |  |
| rs7733480 | 5 | 12695449 |  | UK | 1.07 | (0.95-1.21) | 2.39E-01 |  |
| rs7733480 | 5 | 12695449 |  | US-UCSF | 1.03 | (0.92-1.16) | 5.94E-01 |  |
| rs7733480 | 5 | 12695449 |  | US-Mayo | 1.38 | (1.00-1.91) | 5.36E-02 |  |
| rs7733480 | 5 | 12695449 |  | ALL | 1.08 | (1.04-1.13) | 2.98E-04 | 1.78E-01 |
|  |  |  |  |  |  |  |  |  |
| rs2685890 | X | 32112609 | DMD | Gliomascan | 1.14 | (1.06-1.22) | 3.69E-04 |  |
| rs2685890 | X | 32112609 | DMD | ALL | 1.14 | (1.06-1.22) | 3.75E-04 | nan |
|  |  |  |  |  |  |  |  |  |
| rs392108 | 6 | 4620999 | LOC442153 | Gliomascan | 1.19 | (1.08-1.30) | 2.45E-04 |  |
| rs392108 | 6 | 4620999 | LOC442153 | FRE | 1.05 | (0.93-1.18) | 5.15E-01 |  |
| rs392108 | 6 | 4620999 | LOC442153 | GER | 1.05 | (0.92-1.19) | 5.77E-01 |  |
| rs392108 | 6 | 4620999 | LOC442153 | US-MDA | 1.14 | (1.02-1.26) | 1.22E-02 |  |
| rs392108 | 6 | 4620999 | LOC442153 | UK | 0.95 | (0.84-1.09) | 4.31E-01 |  |
| rs392108 | 6 | 4620999 | LOC442153 | US-Mayo | 1 | (0.72-1.39) | 9.97E-01 |  |
| rs392108 | 6 | 4620999 | LOC442153 | ALL | 1.09 | (1.04-1.15) | 6.16E-04 | 1.05E-01 |
|  |  |  |  |  |  |  |  |  |
| rs13215569 | 6 | 163207269 | PACRG | Gliomascan | 1.36 | (1.17-1.58) | 5.45E-05 |  |
| rs13215569 | 6 | 163207269 | PACRG | FRE | 1.08 | (0.87-1.32) | 4.82E-01 |  |
| rs13215569 | 6 | 163207269 | PACRG | GER | 1.12 | (0.91-1.38) | 1.48E-01 |  |
| rs13215569 | 6 | 163207269 | PACRG | US-MDA | 0.93 | (0.78-1.10) | 3.85E-01 |  |
| rs13215569 | 6 | 163207269 | PACRG | UK | 1.04 | (0.84-1.28) | 8.16E-01 |  |
| rs13215569 | 6 | 163207269 | PACRG | US-UCSF | 1.21 | (0.99-1.47) | 5.96E-02 |  |
| rs13215569 | 6 | 163207269 | PACRG | US-Mayo | 1.35 | (0.82-2.23) | 2.36E-01 |  |
| rs13215569 | 6 | 163207269 | PACRG | ALL | 1.14 | (1.05-1.22) | 9.27E-04 | 5.02E-02 |
|  |  |  |  |  |  |  |  |  |
| rs12529670 | 6 | 89134908 |  | Gliomascan | 1.23 | (1.11-1.36) | 5.01E-05 |  |
| rs12529670 | 6 | 89134908 |  | FRE | 1.12 | (0.99-1.27) | 4.17E-02 |  |
| rs12529670 | 6 | 89134908 |  | GER | 1.06 | (0.91-1.22) | 3.76E-01 |  |
| rs12529670 | 6 | 89134908 |  | US-MDA | 1 | (0.89-1.13) | 7.27E-01 |  |
| rs12529670 | 6 | 89134908 |  | UK | 0.95 | (0.82-1.10) | 5.28E-01 |  |
| rs12529670 | 6 | 89134908 |  | US-UCSF | 1.08 | (0.94-1.23) | 2.72E-01 |  |
| rs12529670 | 6 | 89134908 |  | US-Mayo | 1.15 | (0.81-1.65) | 4.32E-01 |  |
| rs12529670 | 6 | 89134908 |  | ALL | 1.09 | (1.04-1.15) | 9.70E-04 | 7.74E-02 |
|  |  |  |  |  |  |  |  |  |
| rs1008628 | 14 | 104793771 | BRF1,BTBD6 | Gliomascan | 0.82 | (0.74-0.91) | 2.20E-04 |  |
| rs1008628 | 14 | 104793771 | BRF1,BTBD6 | US-Mayo | 1.13 | (0.83-1.55) | 4.45E-01 |  |
| rs1008628 | 14 | 104793771 | BRF1,BTBD6 | ALL | 0.85 | (0.77-0.94) | 1.10E-03 | 5.95E-02 |
|  |  |  |  |  |  |  |  |  |
| rs4862110 | 4 | 183988023 |  | Gliomascan | 1.19 | (1.08-1.31) | 2.59E-04 |  |
| rs4862110 | 4 | 183988023 |  | US-UCSF | 1.07 | (0.93-1.25) | 3.47E-01 |  |
| rs4862110 | 4 | 183988023 |  | US-Mayo | 0.72 | (0.49-1.07) | 1.05E-01 |  |
| rs4862110 | 4 | 183988023 |  | ALL | 1.14 | (1.05-1.23) | 1.42E-03 | 3.62E-02 |
|  |  |  |  |  |  |  |  |  |
| rs11751591 | 6 | 33902193 |  | Gliomascan | 1.25 | (1.11-1.41) | 2.89E-04 |  |
| rs11751591 | 6 | 33902193 |  | US-Mayo | 0.8 | (0.53-1.22) | 3.05E-01 |  |
| rs11751591 | 6 | 33902193 |  | ALL | 1.21 | (1.08-1.36) | 1.43E-03 | 4.59E-02 |
|  |  |  |  |  |  |  |  |  |
| rs9586 | 3 | 49188641 | CCDC71,KLHDC8B,LOC646498 | Gliomascan | 1.22 | (1.10-1.35) | 1.44E-04 |  |
| rs9586 | 3 | 49188641 | CCDC71,KLHDC8B,LOC646498 | FRE | 1.15 | (1.01-1.30) | 7.38E-02 |  |
| rs9586 | 3 | 49188641 | CCDC71,KLHDC8B,LOC646498 | GER | 1 | (0.87-1.15) | 4.92E-01 |  |
| rs9586 | 3 | 49188641 | CCDC71,KLHDC8B,LOC646498 | US-MDA | 0.93 | (0.83-1.05) | 3.00E-01 |  |
| rs9586 | 3 | 49188641 | CCDC71,KLHDC8B,LOC646498 | UK | 1.12 | (0.97-1.29) | 1.22E-01 |  |
| rs9586 | 3 | 49188641 | CCDC71,KLHDC8B,LOC646498 | US-Mayo | 1.2 | (0.79-1.82) | 3.84E-01 |  |
| rs9586 | 3 | 49188641 | CCDC71,KLHDC8B,LOC646498 | ALL | 1.09 | (1.03-1.15) | 1.84E-03 | 1.80E-02 |
|  |  |  |  |  |  |  |  |  |
| rs1485587 | 5 | 81362798 | ATG10 | Gliomascan | 0.83 | (0.77-0.91) | 4.14E-05 |  |
| rs1485587 | 5 | 81362798 | ATG10 | FRE | 0.99 | (0.89-1.10) | 9.31E-01 |  |
| rs1485587 | 5 | 81362798 | ATG10 | GER | 1.05 | (0.93-1.19) | 2.62E-01 |  |
| rs1485587 | 5 | 81362798 | ATG10 | US-MDA | 0.97 | (0.88-1.06) | 3.38E-01 |  |
| rs1485587 | 5 | 81362798 | ATG10 | UK | 1 | (0.89-1.13) | 9.25E-01 |  |
| rs1485587 | 5 | 81362798 | ATG10 | US-UCSF | 0.87 | (0.78-0.98) | 2.13E-02 |  |
| rs1485587 | 5 | 81362798 | ATG10 | US-Mayo | 0.87 | (0.64-1.18) | 3.58E-01 |  |
| rs1485587 | 5 | 81362798 | ATG10 | ALL | 0.93 | (0.89-0.98) | 1.90E-03 | 2.43E-02 |
|  |  |  |  |  |  |  |  |  |
| rs8083625 | 18 | 19952538 | TTC39C | Gliomascan | 1.19 | (1.09-1.31) | 1.97E-04 |  |
| rs8083625 | 18 | 19952538 | TTC39C | US-UCSF | 1.01 | (0.89-1.14) | 9.24E-01 |  |
| rs8083625 | 18 | 19952538 | TTC39C | US-Mayo | 1.1 | (0.80-1.51) | 5.62E-01 |  |
| rs8083625 | 18 | 19952538 | TTC39C | ALL | 1.12 | (1.04-1.20) | 2.10E-03 | 9.49E-02 |
|  |  |  |  |  |  |  |  |  |
| rs10163625 | 18 | 19953235 | TTC39C,CABYR | Gliomascan | 1.22 | (1.11-1.34) | 5.68E-05 |  |
| rs10163625 | 18 | 19953235 | TTC39C,CABYR | FRE | 1 | (0.88-1.13) | 8.51E-01 |  |
| rs10163625 | 18 | 19953235 | TTC39C,CABYR | GER | 1.08 | (0.94-1.24) | 4.46E-01 |  |
| rs10163625 | 18 | 19953235 | TTC39C,CABYR | US-MDA | 1 | (0.89-1.11) | 8.51E-01 |  |
| rs10163625 | 18 | 19953235 | TTC39C,CABYR | UK | 1.07 | (0.93-1.23) | 3.80E-01 |  |
| rs10163625 | 18 | 19953235 | TTC39C,CABYR | US-Mayo | 1.23 | (0.87-1.74) | 2.33E-01 |  |
| rs10163625 | 18 | 19953235 | TTC39C,CABYR | ALL | 1.09 | (1.03-1.14) | 2.10E-03 | 6.85E-02 |
|  |  |  |  |  |  |  |  |  |
| rs11084460 | 19 | 61890337 | ZNF835 | Gliomascan | 1.19 | (1.09-1.30) | 8.47E-05 |  |
| rs11084460 | 19 | 61890337 | ZNF835 | FRE | 1 | (0.90-1.12) | 7.85E-01 |  |
| rs11084460 | 19 | 61890337 | ZNF835 | GER | 0.99 | (0.87-1.11) | 5.24E-01 |  |
| rs11084460 | 19 | 61890337 | ZNF835 | US-MDA | 1.09 | (0.99-1.20) | 1.14E-01 |  |
| rs11084460 | 19 | 61890337 | ZNF835 | UK | 1.01 | (0.90-1.14) | 8.18E-01 |  |
| rs11084460 | 19 | 61890337 | ZNF835 | US-UCSF | 1.02 | (0.91-1.15) | 6.81E-01 |  |
| rs11084460 | 19 | 61890337 | ZNF835 | US-Mayo | 1.26 | (0.93-1.71) | 1.43E-01 |  |
| rs11084460 | 19 | 61890337 | ZNF835 | ALL | 1.07 | (1.02-1.12) | 2.30E-03 | 7.59E-02 |
|  |  |  |  |  |  |  |  |  |
| rs12068912 | 1 | 193547047 |  | Gliomascan | 1.26 | (1.12-1.42) | 1.28E-04 |  |
| rs12068912 | 1 | 193547047 |  | FRE | 1.11 | (0.95-1.28) | 3.17E-01 |  |
| rs12068912 | 1 | 193547047 |  | GER | 0.98 | (0.83-1.16) | 8.10E-01 |  |
| rs12068912 | 1 | 193547047 |  | US-MDA | 1.01 | (0.88-1.15) | 8.03E-01 |  |
| rs12068912 | 1 | 193547047 |  | UK | 1.16 | (0.99-1.35) | 5.36E-02 |  |
| rs12068912 | 1 | 193547047 |  | US-UCSF | 1.04 | (0.89-1.22) | 5.82E-01 |  |
| rs12068912 | 1 | 193547047 |  | US-Mayo | 0.76 | (0.52-1.11) | 1.59E-01 |  |
| rs12068912 | 1 | 193547047 |  | ALL | 1.09 | (1.03-1.16) | 2.44E-03 | 4.40E-02 |
|  |  |  |  |  |  |  |  |  |
| rs949902 | 6 | 163170768 | PACRG | Gliomascan | 1.36 | (1.19-1.56) | 9.20E-06 |  |
| rs949902 | 6 | 163170768 | PACRG | FRE | 1.14 | (0.93-1.38) | 3.21E-01 |  |
| rs949902 | 6 | 163170768 | PACRG | GER | 1.15 | (0.95-1.40) | 8.54E-02 |  |
| rs949902 | 6 | 163170768 | PACRG | US-MDA | 0.9 | (0.77-1.06) | 2.36E-01 |  |
| rs949902 | 6 | 163170768 | PACRG | UK | 0.95 | (0.77-1.17) | 5.92E-01 |  |
| rs949902 | 6 | 163170768 | PACRG | US-Mayo | 1.66 | (0.99-2.76) | 5.33E-02 |  |
| rs949902 | 6 | 163170768 | PACRG | ALL | 1.12 | (1.04-1.21) | 2.54E-03 | 1.52E-03 |
|  |  |  |  |  |  |  |  |  |
| rs3862058 | 5 | 85803745 |  | Gliomascan | 1.2 | (1.09-1.31) | 1.55E-04 |  |
| rs3862058 | 5 | 85803745 |  | FRE | 1.07 | (0.94-1.21) | 3.03E-01 |  |
| rs3862058 | 5 | 85803745 |  | GER | 1.02 | (0.89-1.17) | 9.89E-01 |  |
| rs3862058 | 5 | 85803745 |  | US-MDA | 1.08 | (0.97-1.20) | 2.42E-01 |  |
| rs3862058 | 5 | 85803745 |  | UK | 0.87 | (0.76-1.00) | 6.16E-02 |  |
| rs3862058 | 5 | 85803745 |  | US-UCSF | 1.09 | (0.96-1.24) | 1.56E-01 |  |
| rs3862058 | 5 | 85803745 |  | US-Mayo | 1.13 | (0.81-1.58) | 4.66E-01 |  |
| rs3862058 | 5 | 85803745 |  | ALL | 1.07 | (1.02-1.13) | 2.99E-03 | 2.28E-02 |
|  |  |  |  |  |  |  |  |  |
| rs12469549 | 2 | 78971668 |  | Gliomascan | 0.82 | (0.75-0.91) | 6.46E-05 |  |
| rs12469549 | 2 | 78971668 |  | US-UCSF | 1 | (0.88-1.13) | 9.30E-01 |  |
| rs12469549 | 2 | 78971668 |  | US-Mayo | 1.16 | (0.84-1.59) | 3.77E-01 |  |
| rs12469549 | 2 | 78971668 |  | ALL | 0.89 | (0.83-0.96) | 3.32E-03 | 1.77E-02 |
|  |  |  |  |  |  |  |  |  |
| rs11897323 | 2 | 105470842 |  | Gliomascan | 0.71 | (0.60-0.84) | 6.98E-05 |  |
| rs11897323 | 2 | 105470842 |  | FRE | 0.89 | (0.74-1.06) | 1.68E-01 |  |
| rs11897323 | 2 | 105470842 |  | GER | 1.04 | (0.84-1.29) | 8.77E-01 |  |
| rs11897323 | 2 | 105470842 |  | US-MDA | 1.04 | (0.88-1.24) | 7.01E-01 |  |
| rs11897323 | 2 | 105470842 |  | UK | 0.82 | (0.65-1.04) | 8.61E-02 |  |
| rs11897323 | 2 | 105470842 |  | US-Mayo | 0.77 | (0.43-1.38) | 3.86E-01 |  |
| rs11897323 | 2 | 105470842 |  | ALL | 0.88 | (0.81-0.96) | 3.76E-03 | 2.44E-02 |
|  |  |  |  |  |  |  |  |  |
| rs8037351 | 15 | 93162791 |  | Gliomascan | 1.17 | (1.08-1.28) | 2.74E-04 |  |
| rs8037351 | 15 | 93162791 |  | FRE | 1.1 | (0.99-1.23) | 6.51E-02 |  |
| rs8037351 | 15 | 93162791 |  | GER | 1.01 | (0.90-1.15) | 9.84E-01 |  |
| rs8037351 | 15 | 93162791 |  | US-MDA | 1.02 | (0.93-1.13) | 6.22E-01 |  |
| rs8037351 | 15 | 93162791 |  | UK | 1.04 | (0.92-1.17) | 5.80E-01 |  |
| rs8037351 | 15 | 93162791 |  | US-UCSF | 0.96 | (0.86-1.08) | 5.45E-01 |  |
| rs8037351 | 15 | 93162791 |  | US-Mayo | 1.2 | (0.87-1.64) | 2.62E-01 |  |
| rs8037351 | 15 | 93162791 |  | ALL | 1.07 | (1.02-1.11) | 3.97E-03 | 1.26E-01 |
|  |  |  |  |  |  |  |  |  |
| rs2615519 | 6 | 114220750 |  | Gliomascan | 1.2 | (1.10-1.30) | 4.32E-05 |  |
| rs2615519 | 6 | 114220750 |  | US-UCSF | 0.94 | (0.84-1.06) | 3.40E-01 |  |
| rs2615519 | 6 | 114220750 |  | US-Mayo | 1.2 | (0.88-1.63) | 2.41E-01 |  |
| rs2615519 | 6 | 114220750 |  | ALL | 1.1 | (1.03-1.18) | 4.05E-03 | 4.66E-03 |
|  |  |  |  |  |  |  |  |  |
| rs8072770 | 17 | 43888885 |  | Gliomascan | 0.81 | (0.73-0.89) | 4.59E-05 |  |
| rs8072770 | 17 | 43888885 |  | FRE | 1 | (0.88-1.14) | 9.41E-01 |  |
| rs8072770 | 17 | 43888885 |  | GER | 1.08 | (0.93-1.25) | 2.73E-01 |  |
| rs8072770 | 17 | 43888885 |  | US-MDA | 0.91 | (0.81-1.03) | 1.93E-01 |  |
| rs8072770 | 17 | 43888885 |  | UK | 1 | (0.86-1.16) | 1.00E+00 |  |
| rs8072770 | 17 | 43888885 |  | US-Mayo | 0.96 | (0.68-1.37) | 8.32E-01 |  |
| rs8072770 | 17 | 43888885 |  | ALL | 0.93 | (0.88-0.98) | 9.45E-03 | 2.23E-02 |
|  |  |  |  |  |  |  |  |  |
| rs1877818 | 3 | 103290282 |  | Gliomascan | 1.19 | (1.09-1.30) | 8.82E-05 |  |
| rs1877818 | 3 | 103290282 |  | FRE | 1.05 | (0.94-1.18) | 6.28E-01 |  |
| rs1877818 | 3 | 103290282 |  | GER | 0.9 | (0.79-1.02) | 1.22E-01 |  |
| rs1877818 | 3 | 103290282 |  | US-MDA | 0.99 | (0.90-1.10) | 9.23E-01 |  |
| rs1877818 | 3 | 103290282 |  | UK | 1.03 | (0.91-1.16) | 7.68E-01 |  |
| rs1877818 | 3 | 103290282 |  | US-UCSF | 1.12 | (0.99-1.26) | 6.39E-02 |  |
| rs1877818 | 3 | 103290282 |  | US-Mayo | 1.03 | (0.76-1.41) | 8.46E-01 |  |
| rs1877818 | 3 | 103290282 |  | ALL | 1.06 | (1.01-1.10) | 1.19E-02 | 1.25E-02 |
|  |  |  |  |  |  |  |  |  |
| rs6828580 | 4 | 57682190 | IGFBP7 | Gliomascan | 0.77 | (0.68-0.88) | 1.01E-04 |  |
| rs6828580 | 4 | 57682190 | IGFBP7 | FRE | 1.06 | (0.90-1.24) | 4.03E-01 |  |
| rs6828580 | 4 | 57682190 | IGFBP7 | GER | 0.96 | (0.80-1.15) | 8.13E-01 |  |
| rs6828580 | 4 | 57682190 | IGFBP7 | US-MDA | 0.94 | (0.81-1.08) | 3.23E-01 |  |
| rs6828580 | 4 | 57682190 | IGFBP7 | UK | 0.85 | (0.70-1.02) | 8.97E-02 |  |
| rs6828580 | 4 | 57682190 | IGFBP7 | US-UCSF | 1 | (0.85-1.19) | 9.54E-01 |  |
| rs6828580 | 4 | 57682190 | IGFBP7 | US-Mayo | 1.5 | (0.96-2.35) | 7.67E-02 |  |
| rs6828580 | 4 | 57682190 | IGFBP7 | ALL | 0.92 | (0.87-0.98) | 1.22E-02 | 1.21E-02 |
|  |  |  |  |  |  |  |  |  |
| rs3012359 | 9 | 106095661 |  | Gliomascan | 0.82 | (0.75-0.90) | 2.74E-05 |  |
| rs3012359 | 9 | 106095661 |  | FRE | 0.97 | (0.87-1.09) | 6.73E-01 |  |
| rs3012359 | 9 | 106095661 |  | GER | 0.96 | (0.84-1.09) | 3.62E-01 |  |
| rs3012359 | 9 | 106095661 |  | US-MDA | 1.07 | (0.96-1.18) | 6.99E-01 |  |
| rs3012359 | 9 | 106095661 |  | UK | 0.97 | (0.85-1.10) | 6.03E-01 |  |
| rs3012359 | 9 | 106095661 |  | US-UCSF | 0.96 | (0.85-1.08) | 4.98E-01 |  |
| rs3012359 | 9 | 106095661 |  | US-Mayo | 0.83 | (0.60-1.16) | 2.72E-01 |  |
| rs3012359 | 9 | 106095661 |  | ALL | 0.94 | (0.90-0.99) | 1.24E-02 | 1.76E-02 |
|  |  |  |  |  |  |  |  |  |
| rs4932552 | 15 | 89892176 |  | Gliomascan | 0.81 | (0.73-0.89) | 1.62E-05 |  |
| rs4932552 | 15 | 89892176 |  | FRE | 0.93 | (0.82-1.05) | 2.38E-01 |  |
| rs4932552 | 15 | 89892176 |  | GER | 1.05 | (0.92-1.21) | 4.67E-01 |  |
| rs4932552 | 15 | 89892176 |  | US-MDA | 1.08 | (0.96-1.21) | 1.94E-01 |  |
| rs4932552 | 15 | 89892176 |  | UK | 0.96 | (0.83-1.10) | 5.58E-01 |  |
| rs4932552 | 15 | 89892176 |  | US-UCSF | 0.92 | (0.81-1.05) | 2.23E-01 |  |
| rs4932552 | 15 | 89892176 |  | US-Mayo | 0.98 | (0.69-1.39) | 8.99E-01 |  |
| rs4932552 | 15 | 89892176 |  | ALL | 0.94 | (0.89-0.99) | 1.45E-02 | 6.51E-03 |
|  |  |  |  |  |  |  |  |  |
| rs10772362 | 12 | 10843443 | TAS2R7,TAS2R8,TAS2R9 | Gliomascan | 0.79 | (0.71-0.88) | 1.38E-05 |  |
| rs10772362 | 12 | 10843443 | TAS2R7,TAS2R8,TAS2R9 | FRE | 0.99 | (0.87-1.13) | 8.82E-01 |  |
| rs10772362 | 12 | 10843443 | TAS2R7,TAS2R8,TAS2R9 | GER | 1.02 | (0.88-1.17) | 4.58E-01 |  |
| rs10772362 | 12 | 10843443 | TAS2R7,TAS2R8,TAS2R9 | US-MDA | 1.02 | (0.91-1.14) | 8.63E-01 |  |
| rs10772362 | 12 | 10843443 | TAS2R7,TAS2R8,TAS2R9 | UK | 0.96 | (0.83-1.11) | 4.77E-01 |  |
| rs10772362 | 12 | 10843443 | TAS2R7,TAS2R8,TAS2R9 | US-UCSF | 0.99 | (0.86-1.13) | 8.67E-01 |  |
| rs10772362 | 12 | 10843443 | TAS2R7,TAS2R8,TAS2R9 | US-Mayo | 0.75 | (0.52-1.07) | 1.15E-01 |  |
| rs10772362 | 12 | 10843443 | TAS2R7,TAS2R8,TAS2R9 | ALL | 0.94 | (0.89-0.99) | 1.64E-02 | 1.37E-02 |
|  |  |  |  |  |  |  |  |  |
| rs4501178 | 4 | 162696532 | FSTL5 | Gliomascan | 1.24 | (1.11-1.39) | 1.21E-04 |  |
| rs4501178 | 4 | 162696532 | FSTL5 | FRE | 1.09 | (0.94-1.26) | 2.27E-01 |  |
| rs4501178 | 4 | 162696532 | FSTL5 | GER | 1.08 | (0.92-1.27) | 6.90E-01 |  |
| rs4501178 | 4 | 162696532 | FSTL5 | US-MDA | 0.97 | (0.85-1.11) | 7.93E-01 |  |
| rs4501178 | 4 | 162696532 | FSTL5 | UK | 0.93 | (0.78-1.10) | 3.79E-01 |  |
| rs4501178 | 4 | 162696532 | FSTL5 | US-Mayo | 0.9 | (0.59-1.37) | 6.19E-01 |  |
| rs4501178 | 4 | 162696532 | FSTL5 | ALL | 1.08 | (1.01-1.15) | 1.66E-02 | 2.89E-02 |
|  |  |  |  |  |  |  |  |  |
| rs13050480 | 21 | 37152831 | HLCS | Gliomascan | 0.84 | (0.77-0.92) | 1.01E-04 |  |
| rs13050480 | 21 | 37152831 | HLCS | FRE | 0.92 | (0.82-1.02) | 1.31E-01 |  |
| rs13050480 | 21 | 37152831 | HLCS | GER | 1.13 | (1.00-1.28) | 1.25E-01 |  |
| rs13050480 | 21 | 37152831 | HLCS | US-MDA | 0.98 | (0.89-1.09) | 7.95E-01 |  |
| rs13050480 | 21 | 37152831 | HLCS | UK | 0.95 | (0.84-1.07) | 3.80E-01 |  |
| rs13050480 | 21 | 37152831 | HLCS | US-Mayo | 1.08 | (0.79-1.48) | 6.28E-01 |  |
| rs13050480 | 21 | 37152831 | HLCS | ALL | 0.94 | (0.90-0.99) | 1.72E-02 | 5.21E-03 |
|  |  |  |  |  |  |  |  |  |
| rs10514231 | 5 | 81343168 | ATG10,PPIAP11 | Gliomascan | 0.83 | (0.75-0.90) | 3.75E-05 |  |
| rs10514231 | 5 | 81343168 | ATG10,PPIAP11 | FRE | 0.98 | (0.87-1.09) | 8.74E-01 |  |
| rs10514231 | 5 | 81343168 | ATG10,PPIAP11 | GER | 0.99 | (0.87-1.13) | 8.47E-01 |  |
| rs10514231 | 5 | 81343168 | ATG10,PPIAP11 | US-MDA | 1.02 | (0.92-1.13) | 9.48E-01 |  |
| rs10514231 | 5 | 81343168 | ATG10,PPIAP11 | UK | 0.99 | (0.87-1.13) | 9.39E-01 |  |
| rs10514231 | 5 | 81343168 | ATG10,PPIAP11 | US-UCSF | 0.92 | (0.81-1.04) | 1.69E-01 |  |
| rs10514231 | 5 | 81343168 | ATG10,PPIAP11 | US-Mayo | 1.37 | (1.00-1.88) | 4.97E-02 |  |
| rs10514231 | 5 | 81343168 | ATG10,PPIAP11 | ALL | 0.95 | (0.91-0.99) | 1.73E-02 | 7.98E-03 |
|  |  |  |  |  |  |  |  |  |
| rs12692328 | 2 | 6992388 | RNF144A | Gliomascan | 0.85 | (0.77-0.93) | 2.64E-04 |  |
| rs12692328 | 2 | 6992388 | RNF144A | FRE | 0.93 | (0.83-1.05) | 2.25E-01 |  |
| rs12692328 | 2 | 6992388 | RNF144A | GER | 0.91 | (0.80-1.04) | 2.54E-01 |  |
| rs12692328 | 2 | 6992388 | RNF144A | US-MDA | 0.97 | (0.87-1.07) | 3.15E-01 |  |
| rs12692328 | 2 | 6992388 | RNF144A | UK | 1.04 | (0.92-1.18) | 5.01E-01 |  |
| rs12692328 | 2 | 6992388 | RNF144A | US-UCSF | 1.09 | (0.97-1.23) | 1.43E-01 |  |
| rs12692328 | 2 | 6992388 | RNF144A | US-Mayo | 1.03 | (0.74-1.42) | 8.62E-01 |  |
| rs12692328 | 2 | 6992388 | RNF144A | ALL | 0.95 | (0.91-0.99) | 2.76E-02 | 2.20E-02 |
|  |  |  |  |  |  |  |  |  |
| rs17797090 | 12 | 102848396 | LOC253724,HSP90B1 | Gliomascan | 1.36 | (1.16-1.59) | 1.16E-04 |  |
| rs17797090 | 12 | 102848396 | LOC253724,HSP90B1 | FRE | 1.01 | (0.84-1.22) | 8.90E-01 |  |
| rs17797090 | 12 | 102848396 | LOC253724,HSP90B1 | GER | 1.09 | (0.87-1.37) | 4.70E-01 |  |
| rs17797090 | 12 | 102848396 | LOC253724,HSP90B1 | US-MDA | 1 | (0.84-1.18) | 8.94E-01 |  |
| rs17797090 | 12 | 102848396 | LOC253724,HSP90B1 | UK | 0.93 | (0.74-1.16) | 4.66E-01 |  |
| rs17797090 | 12 | 102848396 | LOC253724,HSP90B1 | US-Mayo | 1.26 | (0.68-2.33) | 4.67E-01 |  |
| rs17797090 | 12 | 102848396 | LOC253724,HSP90B1 | ALL | 1.1 | (1.01-1.19) | 3.06E-02 | 4.08E-02 |
|  |  |  |  |  |  |  |  |  |
| rs4075770 | 1 | 19004362 |  | Gliomascan | 1.24 | (1.12-1.39) | 6.41E-05 |  |
| rs4075770 | 1 | 19004362 |  | FRE | 1 | (0.88-1.13) | 9.13E-01 |  |
| rs4075770 | 1 | 19004362 |  | GER | 1.03 | (0.89-1.18) | 9.47E-01 |  |
| rs4075770 | 1 | 19004362 |  | US-MDA | 0.98 | (0.87-1.09) | 7.30E-01 |  |
| rs4075770 | 1 | 19004362 |  | UK | 1.04 | (0.91-1.20) | 5.95E-01 |  |
| rs4075770 | 1 | 19004362 |  | US-Mayo | 0.98 | (0.70-1.37) | 9.02E-01 |  |
| rs4075770 | 1 | 19004362 |  | ALL | 1.06 | (1.01-1.12) | 3.13E-02 | 3.57E-02 |
|  |  |  |  |  |  |  |  |  |
| rs2232571 | 20 | 36407498 | BPI,LBP | Gliomascan | 1.25 | (1.11-1.40) | 1.40E-04 |  |
| rs2232571 | 20 | 36407498 | BPI,LBP | FRE | 0.91 | (0.79-1.06) | 1.26E-01 |  |
| rs2232571 | 20 | 36407498 | BPI,LBP | GER | 1 | (0.85-1.18) | 1.00E+00 |  |
| rs2232571 | 20 | 36407498 | BPI,LBP | US-MDA | 1.06 | (0.94-1.21) | 5.86E-01 |  |
| rs2232571 | 20 | 36407498 | BPI,LBP | UK | 1.02 | (0.87-1.20) | 7.72E-01 |  |
| rs2232571 | 20 | 36407498 | BPI,LBP | US-Mayo | 1.06 | (0.72-1.56) | 7.54E-01 |  |
| rs2232571 | 20 | 36407498 | BPI,LBP | ALL | 1.07 | (1.01-1.14) | 3.35E-02 | 2.93E-02 |
|  |  |  |  |  |  |  |  |  |
| rs744432 | 8 | 74418054 | LOC100127988 | Gliomascan | 0.84 | (0.77-0.91) | 5.69E-05 |  |
| rs744432 | 8 | 74418054 | LOC100127988 | FRE | 0.88 | (0.79-0.98) | 3.27E-02 |  |
| rs744432 | 8 | 74418054 | LOC100127988 | GER | 0.98 | (0.87-1.11) | 6.95E-01 |  |
| rs744432 | 8 | 74418054 | LOC100127988 | US-MDA | 1.06 | (0.96-1.17) | 1.33E-01 |  |
| rs744432 | 8 | 74418054 | LOC100127988 | UK | 1 | (0.88-1.13) | 9.75E-01 |  |
| rs744432 | 8 | 74418054 | LOC100127988 | US-UCSF | 1.09 | (0.97-1.22) | 1.55E-01 |  |
| rs744432 | 8 | 74418054 | LOC100127988 | US-Mayo | 0.85 | (0.64-1.14) | 2.82E-01 |  |
| rs744432 | 8 | 74418054 | LOC100127988 | ALL | 0.95 | (0.91-1.00) | 3.39E-02 | 1.45E-03 |
|  |  |  |  |  |  |  |  |  |
| rs10898199 | 11 | 83452974 | DLG2 | Gliomascan | 1.35 | (1.17-1.54) | 1.76E-05 |  |
| rs10898199 | 11 | 83452974 | DLG2 | FRE | 0.95 | (0.78-1.15) | 3.24E-01 |  |
| rs10898199 | 11 | 83452974 | DLG2 | GER | 0.92 | (0.73-1.15) | 4.43E-01 |  |
| rs10898199 | 11 | 83452974 | DLG2 | US-MDA | 1.03 | (0.87-1.22) | 9.34E-01 |  |
| rs10898199 | 11 | 83452974 | DLG2 | UK | 0.9 | (0.73-1.12) | 3.19E-01 |  |
| rs10898199 | 11 | 83452974 | DLG2 | US-UCSF | 1.11 | (0.92-1.35) | 2.78E-01 |  |
| rs10898199 | 11 | 83452974 | DLG2 | US-Mayo | 1.16 | (0.65-2.05) | 6.19E-01 |  |
| rs10898199 | 11 | 83452974 | DLG2 | ALL | 1.08 | (1.01-1.16) | 3.43E-02 | 8.72E-03 |
|  |  |  |  |  |  |  |  |  |
| rs3820320 | 1 | 20402795 |  | Gliomascan | 0.8 | (0.72-0.89) | 3.62E-05 |  |
| rs3820320 | 1 | 20402795 |  | FRE | 1 | (0.87-1.15) | 8.59E-01 |  |
| rs3820320 | 1 | 20402795 |  | GER | 1.06 | (0.92-1.23) | 2.91E-01 |  |
| rs3820320 | 1 | 20402795 |  | US-MDA | 0.9 | (0.80-1.01) | 1.84E-01 |  |
| rs3820320 | 1 | 20402795 |  | UK | 1.01 | (0.87-1.18) | 7.72E-01 |  |
| rs3820320 | 1 | 20402795 |  | US-UCSF | 1.08 | (0.94-1.24) | 2.58E-01 |  |
| rs3820320 | 1 | 20402795 |  | US-Mayo | 0.93 | (0.64-1.35) | 6.99E-01 |  |
| rs3820320 | 1 | 20402795 |  | ALL | 0.95 | (0.90-1.00) | 3.74E-02 | 7.16E-03 |
|  |  |  |  |  |  |  |  |  |
| rs2991819 | 10 | 8894344 |  | Gliomascan | 1.25 | (1.12-1.40) | 1.19E-04 |  |
| rs2991819 | 10 | 8894344 |  | FRE | 0.9 | (0.78-1.05) | 2.64E-01 |  |
| rs2991819 | 10 | 8894344 |  | GER | 1.12 | (0.95-1.32) | 1.69E-01 |  |
| rs2991819 | 10 | 8894344 |  | US-MDA | 1 | (0.88-1.15) | 6.18E-01 |  |
| rs2991819 | 10 | 8894344 |  | UK | 0.91 | (0.77-1.08) | 2.77E-01 |  |
| rs2991819 | 10 | 8894344 |  | US-UCSF | 1.14 | (0.98-1.33) | 9.75E-02 |  |
| rs2991819 | 10 | 8894344 |  | US-Mayo | 0.89 | (0.59-1.32) | 5.55E-01 |  |
| rs2991819 | 10 | 8894344 |  | ALL | 1.06 | (1.00-1.13) | 3.74E-02 | 5.58E-03 |
|  |  |  |  |  |  |  |  |  |
| rs1033583 | 6 | 170433848 | LOC285804,DLL1 | Gliomascan | 1.2 | (1.10-1.32) | 4.60E-05 |  |
| rs1033583 | 6 | 170433848 | LOC285804,DLL1 | FRE | 0.97 | (0.87-1.09) | 5.31E-01 |  |
| rs1033583 | 6 | 170433848 | LOC285804,DLL1 | GER | 1.01 | (0.89-1.15) | 9.22E-01 |  |
| rs1033583 | 6 | 170433848 | LOC285804,DLL1 | US-MDA | 1.03 | (0.93-1.14) | 9.68E-01 |  |
| rs1033583 | 6 | 170433848 | LOC285804,DLL1 | UK | 0.96 | (0.85-1.09) | 6.07E-01 |  |
| rs1033583 | 6 | 170433848 | LOC285804,DLL1 | US-UCSF | 1 | (0.89-1.13) | 9.36E-01 |  |
| rs1033583 | 6 | 170433848 | LOC285804,DLL1 | US-Mayo | 1.11 | (0.81-1.54) | 5.04E-01 |  |
| rs1033583 | 6 | 170433848 | LOC285804,DLL1 | ALL | 1.05 | (1.00-1.10) | 3.99E-02 | 3.43E-02 |
|  |  |  |  |  |  |  |  |  |
| rs9675493 | 18 | 37714980 |  | Gliomascan | 0.83 | (0.76-0.91) | 4.62E-05 |  |
| rs9675493 | 18 | 37714980 |  | FRE | 1.11 | (0.99-1.24) | 6.53E-02 |  |
| rs9675493 | 18 | 37714980 |  | GER | 1.02 | (0.90-1.16) | 7.27E-01 |  |
| rs9675493 | 18 | 37714980 |  | US-MDA | 0.96 | (0.87-1.06) | 5.81E-01 |  |
| rs9675493 | 18 | 37714980 |  | UK | 0.98 | (0.86-1.12) | 7.46E-01 |  |
| rs9675493 | 18 | 37714980 |  | US-UCSF | 0.94 | (0.84-1.06) | 3.34E-01 |  |
| rs9675493 | 18 | 37714980 |  | US-Mayo | 0.95 | (0.69-1.31) | 7.60E-01 |  |
| rs9675493 | 18 | 37714980 |  | ALL | 0.95 | (0.91-1.00) | 4.22E-02 | 7.82E-03 |
|  |  |  |  |  |  |  |  |  |
| rs861204 | 12 | 49524083 | TMPRSS12 | Gliomascan | 1.23 | (1.12-1.35) | 7.46E-06 |  |
| rs861204 | 12 | 49524083 | TMPRSS12 | FRE | 1.06 | (0.94-1.18) | 2.98E-01 |  |
| rs861204 | 12 | 49524083 | TMPRSS12 | GER | 1.02 | (0.90-1.16) | 5.45E-01 |  |
| rs861204 | 12 | 49524083 | TMPRSS12 | US-MDA | 0.98 | (0.89-1.09) | 7.82E-01 |  |
| rs861204 | 12 | 49524083 | TMPRSS12 | UK | 0.92 | (0.81-1.05) | 2.52E-01 |  |
| rs861204 | 12 | 49524083 | TMPRSS12 | US-UCSF | 0.97 | (0.86-1.10) | 6.18E-01 |  |
| rs861204 | 12 | 49524083 | TMPRSS12 | US-Mayo | 0.95 | (0.69-1.32) | 7.75E-01 |  |
| rs861204 | 12 | 49524083 | TMPRSS12 | ALL | 1.05 | (1.00-1.09) | 5.44E-02 | 3.74E-03 |
|  |  |  |  |  |  |  |  |  |
| rs7988320 | 13 | 35628750 |  | Gliomascan | 1.25 | (1.11-1.39) | 1.04E-04 |  |
| rs7988320 | 13 | 35628750 |  | FRE | 0.9 | (0.78-1.03) | 1.33E-01 |  |
| rs7988320 | 13 | 35628750 |  | GER | 1.1 | (0.94-1.29) | 3.37E-01 |  |
| rs7988320 | 13 | 35628750 |  | US-MDA | 1.01 | (0.89-1.15) | 5.33E-01 |  |
| rs7988320 | 13 | 35628750 |  | UK | 0.9 | (0.76-1.07) | 2.45E-01 |  |
| rs7988320 | 13 | 35628750 |  | US-UCSF | 1.14 | (0.98-1.32) | 9.68E-02 |  |
| rs7988320 | 13 | 35628750 |  | US-Mayo | 0.7 | (0.45-1.09) | 1.11E-01 |  |
| rs7988320 | 13 | 35628750 |  | ALL | 1.06 | (1.00-1.12) | 5.72E-02 | 1.23E-03 |
|  |  |  |  |  |  |  |  |  |
| rs10106858 | 8 | 71611999 |  | Gliomascan | 1.2 | (1.10-1.31) | 4.74E-05 |  |
| rs10106858 | 8 | 71611999 |  | FRE | 1 | (0.89-1.12) | 9.89E-01 |  |
| rs10106858 | 8 | 71611999 |  | GER | 0.83 | (0.73-0.94) | 3.51E-02 |  |
| rs10106858 | 8 | 71611999 |  | US-MDA | 1.06 | (0.96-1.18) | 6.04E-01 |  |
| rs10106858 | 8 | 71611999 |  | UK | 0.95 | (0.83-1.07) | 4.07E-01 |  |
| rs10106858 | 8 | 71611999 |  | US-UCSF | 1.14 | (1.01-1.28) | 2.81E-02 |  |
| rs10106858 | 8 | 71611999 |  | US-Mayo | 0.76 | (0.56-1.03) | 8.04E-02 |  |
| rs10106858 | 8 | 71611999 |  | ALL | 1.04 | (1.00-1.09) | 6.79E-02 | 2.18E-05 |
|  |  |  |  |  |  |  |  |  |
| rs12107468 | 3 | 138475530 |  | Gliomascan | 0.79 | (0.70-0.90) | 2.54E-04 |  |
| rs12107468 | 3 | 138475530 |  | FRE | 0.98 | (0.83-1.15) | 7.11E-01 |  |
| rs12107468 | 3 | 138475530 |  | GER | 0.82 | (0.68-0.97) | 2.04E-02 |  |
| rs12107468 | 3 | 138475530 |  | US-MDA | 0.99 | (0.86-1.15) | 7.84E-01 |  |
| rs12107468 | 3 | 138475530 |  | UK | 1.13 | (0.94-1.35) | 2.05E-01 |  |
| rs12107468 | 3 | 138475530 |  | US-UCSF | 1.13 | (0.97-1.33) | 1.26E-01 |  |
| rs12107468 | 3 | 138475530 |  | US-Mayo | 0.94 | (0.61-1.43) | 7.65E-01 |  |
| rs12107468 | 3 | 138475530 |  | ALL | 0.95 | (0.89-1.01) | 7.82E-02 | 3.30E-03 |
|  |  |  |  |  |  |  |  |  |
| rs1480298 | 4 | 58421995 |  | Gliomascan | 0.84 | (0.77-0.92) | 2.24E-04 |  |
| rs1480298 | 4 | 58421995 |  | FRE | 0.92 | (0.82-1.03) | 2.28E-01 |  |
| rs1480298 | 4 | 58421995 |  | GER | 0.97 | (0.85-1.11) | 6.32E-01 |  |
| rs1480298 | 4 | 58421995 |  | US-MDA | 1.1 | (1.00-1.22) | 5.30E-02 |  |
| rs1480298 | 4 | 58421995 |  | UK | 1.05 | (0.93-1.20) | 4.06E-01 |  |
| rs1480298 | 4 | 58421995 |  | US-Mayo | 0.79 | (0.58-1.09) | 1.50E-01 |  |
| rs1480298 | 4 | 58421995 |  | ALL | 0.96 | (0.91-1.01) | 8.02E-02 | 2.01E-03 |
|  |  |  |  |  |  |  |  |  |
| rs2222255 | 3 | 96608609 |  | Gliomascan | 0.82 | (0.74-0.90) | 2.24E-05 |  |
| rs2222255 | 3 | 96608609 |  | FRE | 1.03 | (0.92-1.16) | 4.88E-01 |  |
| rs2222255 | 3 | 96608609 |  | GER | 0.93 | (0.82-1.06) | 5.05E-01 |  |
| rs2222255 | 3 | 96608609 |  | US-MDA | 1.02 | (0.92-1.14) | 3.43E-01 |  |
| rs2222255 | 3 | 96608609 |  | UK | 1.05 | (0.92-1.20) | 4.07E-01 |  |
| rs2222255 | 3 | 96608609 |  | US-UCSF | 1.01 | (0.89-1.15) | 8.97E-01 |  |
| rs2222255 | 3 | 96608609 |  | US-Mayo | 1.04 | (0.73-1.47) | 8.45E-01 |  |
| rs2222255 | 3 | 96608609 |  | ALL | 0.96 | (0.92-1.01) | 8.43E-02 | 8.86E-03 |
|  |  |  |  |  |  |  |  |  |
| rs3852050 | 3 | 9333616 |  | Gliomascan | 0.75 | (0.65-0.88) | 1.91E-04 |  |
| rs3852050 | 3 | 9333616 |  | FRE | 1.1 | (0.90-1.33) | 5.15E-01 |  |
| rs3852050 | 3 | 9333616 |  | GER | 0.88 | (0.71-1.10) | 4.96E-01 |  |
| rs3852050 | 3 | 9333616 |  | US-MDA | 1.01 | (0.85-1.20) | 8.44E-01 |  |
| rs3852050 | 3 | 9333616 |  | UK | 0.9 | (0.73-1.12) | 3.45E-01 |  |
| rs3852050 | 3 | 9333616 |  | US-UCSF | 1.11 | (0.92-1.35) | 2.67E-01 |  |
| rs3852050 | 3 | 9333616 |  | US-Mayo | 1.19 | (0.66-2.15) | 5.60E-01 |  |
| rs3852050 | 3 | 9333616 |  | ALL | 0.94 | (0.87-1.01) | 8.72E-02 | 1.76E-02 |
|  |  |  |  |  |  |  |  |  |
| rs10138446 | 14 | 54949438 | KIAA0831,HMGN1L1,TBPL2 | Gliomascan | 1.24 | (1.13-1.35) | 2.35E-06 |  |
| rs10138446 | 14 | 54949438 | KIAA0831,HMGN1L1,TBPL2 | FRE | 0.98 | (0.87-1.10) | 5.90E-01 |  |
| rs10138446 | 14 | 54949438 | KIAA0831,HMGN1L1,TBPL2 | GER | 1.09 | (0.96-1.23) | 1.99E-01 |  |
| rs10138446 | 14 | 54949438 | KIAA0831,HMGN1L1,TBPL2 | US-MDA | 0.97 | (0.88-1.07) | 2.88E-01 |  |
| rs10138446 | 14 | 54949438 | KIAA0831,HMGN1L1,TBPL2 | UK | 0.91 | (0.80-1.04) | 1.72E-01 |  |
| rs10138446 | 14 | 54949438 | KIAA0831,HMGN1L1,TBPL2 | US-UCSF | 0.99 | (0.88-1.12) | 8.88E-01 |  |
| rs10138446 | 14 | 54949438 | KIAA0831,HMGN1L1,TBPL2 | US-Mayo | 0.84 | (0.62-1.13) | 2.41E-01 |  |
| rs10138446 | 14 | 54949438 | KIAA0831,HMGN1L1,TBPL2 | ALL | 1.04 | (0.99-1.09) | 9.09E-02 | 3.34E-04 |
|  |  |  |  |  |  |  |  |  |
| rs12344417 | 9 | 20459336 | MLLT3 | Gliomascan | 1.24 | (1.11-1.38) | 1.17E-04 |  |
| rs12344417 | 9 | 20459336 | MLLT3 | FRE | 0.96 | (0.84-1.09) | 7.87E-01 |  |
| rs12344417 | 9 | 20459336 | MLLT3 | GER | 0.86 | (0.73-1.00) | 4.05E-02 |  |
| rs12344417 | 9 | 20459336 | MLLT3 | US-MDA | 0.91 | (0.80-1.03) | 1.39E-01 |  |
| rs12344417 | 9 | 20459336 | MLLT3 | UK | 1.12 | (0.96-1.31) | 1.54E-01 |  |
| rs12344417 | 9 | 20459336 | MLLT3 | US-UCSF | 1.19 | (1.03-1.37) | 1.93E-02 |  |
| rs12344417 | 9 | 20459336 | MLLT3 | US-Mayo | 0.9 | (0.61-1.33) | 5.96E-01 |  |
| rs12344417 | 9 | 20459336 | MLLT3 | ALL | 1.05 | (0.99-1.10) | 9.73E-02 | 1.64E-04 |
|  |  |  |  |  |  |  |  |  |
| rs2974101 | 5 | 85373032 |  | Gliomascan | 0.84 | (0.77-0.92) | 1.57E-04 |  |
| rs2974101 | 5 | 85373032 |  | FRE | 1.05 | (0.94-1.18) | 4.98E-01 |  |
| rs2974101 | 5 | 85373032 |  | GER | 1.02 | (0.89-1.16) | 8.55E-01 |  |
| rs2974101 | 5 | 85373032 |  | US-MDA | 1 | (0.90-1.11) | 6.57E-01 |  |
| rs2974101 | 5 | 85373032 |  | UK | 0.94 | (0.83-1.07) | 4.12E-01 |  |
| rs2974101 | 5 | 85373032 |  | US-UCSF | 1.01 | (0.89-1.14) | 9.02E-01 |  |
| rs2974101 | 5 | 85373032 |  | US-Mayo | 1.06 | (0.77-1.45) | 7.37E-01 |  |
| rs2974101 | 5 | 85373032 |  | ALL | 0.96 | (0.92-1.01) | 1.02E-01 | 3.61E-02 |
|  |  |  |  |  |  |  |  |  |
| rs2876759 | 13 | 80039485 |  | Gliomascan | 1.19 | (1.09-1.30) | 1.45E-04 |  |
| rs2876759 | 13 | 80039485 |  | FRE | 0.98 | (0.87-1.10) | 7.31E-01 |  |
| rs2876759 | 13 | 80039485 |  | GER | 1.01 | (0.88-1.15) | 9.86E-01 |  |
| rs2876759 | 13 | 80039485 |  | US-MDA | 0.95 | (0.86-1.06) | 2.77E-01 |  |
| rs2876759 | 13 | 80039485 |  | UK | 1.02 | (0.90-1.17) | 7.60E-01 |  |
| rs2876759 | 13 | 80039485 |  | US-UCSF | 0.95 | (0.84-1.07) | 3.91E-01 |  |
| rs2876759 | 13 | 80039485 |  | US-Mayo | 1.42 | (1.04-1.94) | 2.55E-02 |  |
| rs2876759 | 13 | 80039485 |  | ALL | 1.04 | (0.99-1.09) | 1.10E-01 | 4.91E-03 |
|  |  |  |  |  |  |  |  |  |
| rs917634 | 12 | 6501430 | NCAPD2,GAPDH | Gliomascan | 0.85 | (0.78-0.93) | 2.65E-04 |  |
| rs917634 | 12 | 6501430 | NCAPD2,GAPDH | FRE | 0.95 | (0.85-1.06) | 4.96E-01 |  |
| rs917634 | 12 | 6501430 | NCAPD2,GAPDH | GER | 1.14 | (1.01-1.29) | 3.47E-02 |  |
| rs917634 | 12 | 6501430 | NCAPD2,GAPDH | US-MDA | 0.98 | (0.89-1.08) | 9.69E-01 |  |
| rs917634 | 12 | 6501430 | NCAPD2,GAPDH | UK | 1.03 | (0.91-1.17) | 6.13E-01 |  |
| rs917634 | 12 | 6501430 | NCAPD2,GAPDH | US-UCSF | 0.99 | (0.89-1.12) | 9.11E-01 |  |
| rs917634 | 12 | 6501430 | NCAPD2,GAPDH | US-Mayo | 0.87 | (0.64-1.19) | 3.93E-01 |  |
| rs917634 | 12 | 6501430 | NCAPD2,GAPDH | ALL | 0.97 | (0.93-1.01) | 1.11E-01 | 9.22E-03 |
|  |  |  |  |  |  |  |  |  |
| rs841302 | 2 | 129033575 |  | Gliomascan | 1.33 | (1.16-1.52) | 2.29E-05 |  |
| rs841302 | 2 | 129033575 |  | FRE | 0.96 | (0.80-1.14) | 7.56E-01 |  |
| rs841302 | 2 | 129033575 |  | GER | 0.96 | (0.80-1.16) | 9.39E-01 |  |
| rs841302 | 2 | 129033575 |  | US-MDA | 0.93 | (0.79-1.10) | 9.16E-01 |  |
| rs841302 | 2 | 129033575 |  | UK | 1.04 | (0.85-1.26) | 8.01E-01 |  |
| rs841302 | 2 | 129033575 |  | US-UCSF | 1.03 | (0.85-1.24) | 7.81E-01 |  |
| rs841302 | 2 | 129033575 |  | US-Mayo | 0.7 | (0.41-1.21) | 2.00E-01 |  |
| rs841302 | 2 | 129033575 |  | ALL | 1.06 | (0.99-1.13) | 1.17E-01 | 5.57E-03 |
|  |  |  |  |  |  |  |  |  |
| rs1120 | 4 | 85791398 | CDS1 | Gliomascan | 1.24 | (1.11-1.37) | 9.73E-05 |  |
| rs1120 | 4 | 85791398 | CDS1 | FRE | 0.95 | (0.83-1.09) | 5.64E-01 |  |
| rs1120 | 4 | 85791398 | CDS1 | GER | 0.97 | (0.83-1.14) | 4.40E-01 |  |
| rs1120 | 4 | 85791398 | CDS1 | US-MDA | 0.98 | (0.86-1.10) | 4.81E-01 |  |
| rs1120 | 4 | 85791398 | CDS1 | UK | 1 | (0.86-1.16) | 9.54E-01 |  |
| rs1120 | 4 | 85791398 | CDS1 | US-Mayo | 1.1 | (0.78-1.55) | 5.75E-01 |  |
| rs1120 | 4 | 85791398 | CDS1 | ALL | 1.05 | (0.99-1.11) | 1.22E-01 | 1.64E-02 |
|  |  |  |  |  |  |  |  |  |
| rs8007614 | 14 | 54656328 | LGALS3 | Gliomascan | 1.21 | (1.11-1.32) | 1.98E-05 |  |
| rs8007614 | 14 | 54656328 | LGALS3 | FRE | 0.94 | (0.84-1.05) | 2.06E-01 |  |
| rs8007614 | 14 | 54656328 | LGALS3 | GER | 1.03 | (0.91-1.17) | 3.58E-01 |  |
| rs8007614 | 14 | 54656328 | LGALS3 | US-MDA | 0.99 | (0.89-1.09) | 5.34E-01 |  |
| rs8007614 | 14 | 54656328 | LGALS3 | UK | 0.96 | (0.85-1.09) | 5.30E-01 |  |
| rs8007614 | 14 | 54656328 | LGALS3 | US-Mayo | 0.87 | (0.64-1.18) | 3.66E-01 |  |
| rs8007614 | 14 | 54656328 | LGALS3 | ALL | 1.04 | (0.99-1.09) | 1.28E-01 | 2.33E-03 |
|  |  |  |  |  |  |  |  |  |
| rs10878660 | 12 | 66475494 |  | Gliomascan | 1.25 | (1.11-1.39) | 9.90E-05 |  |
| rs10878660 | 12 | 66475494 |  | FRE | 0.95 | (0.83-1.10) | 4.92E-01 |  |
| rs10878660 | 12 | 66475494 |  | GER | 1.08 | (0.92-1.26) | 5.24E-01 |  |
| rs10878660 | 12 | 66475494 |  | US-MDA | 0.94 | (0.83-1.07) | 2.78E-01 |  |
| rs10878660 | 12 | 66475494 |  | UK | 0.98 | (0.83-1.15) | 7.99E-01 |  |
| rs10878660 | 12 | 66475494 |  | US-UCSF | 0.98 | (0.85-1.14) | 8.17E-01 |  |
| rs10878660 | 12 | 66475494 |  | US-Mayo | 1.08 | (0.74-1.59) | 6.88E-01 |  |
| rs10878660 | 12 | 66475494 |  | ALL | 1.04 | (0.99-1.10) | 1.33E-01 | 1.92E-02 |
|  |  |  |  |  |  |  |  |  |
| rs741092 | 12 | 10895318 | PRR4,LOC440082 | Gliomascan | 0.71 | (0.61-0.82) | 1.91E-06 |  |
| rs741092 | 12 | 10895318 | PRR4,LOC440082 | FRE | 1.04 | (0.88-1.23) | 6.02E-01 |  |
| rs741092 | 12 | 10895318 | PRR4,LOC440082 | GER | 1.08 | (0.89-1.30) | 2.87E-01 |  |
| rs741092 | 12 | 10895318 | PRR4,LOC440082 | US-MDA | 1.05 | (0.90-1.23) | 8.81E-01 |  |
| rs741092 | 12 | 10895318 | PRR4,LOC440082 | UK | 1 | (0.83-1.21) | 9.44E-01 |  |
| rs741092 | 12 | 10895318 | PRR4,LOC440082 | US-UCSF | 1.05 | (0.88-1.25) | 5.57E-01 |  |
| rs741092 | 12 | 10895318 | PRR4,LOC440082 | US-Mayo | 0.7 | (0.45-1.10) | 1.24E-01 |  |
| rs741092 | 12 | 10895318 | PRR4,LOC440082 | ALL | 0.95 | (0.89-1.02) | 1.35E-01 | 4.72E-04 |
|  |  |  |  |  |  |  |  |  |
| rs8102512 | 19 | 36360499 |  | Gliomascan | 1.18 | (1.08-1.29) | 2.14E-04 |  |
| rs8102512 | 19 | 36360499 |  | FRE | 0.96 | (0.86-1.08) | 6.22E-01 |  |
| rs8102512 | 19 | 36360499 |  | GER | 0.91 | (0.81-1.03) | 4.83E-01 |  |
| rs8102512 | 19 | 36360499 |  | US-MDA | 0.98 | (0.88-1.08) | 6.17E-01 |  |
| rs8102512 | 19 | 36360499 |  | UK | 0.96 | (0.85-1.09) | 5.96E-01 |  |
| rs8102512 | 19 | 36360499 |  | US-UCSF | 1.05 | (0.93-1.18) | 4.40E-01 |  |
| rs8102512 | 19 | 36360499 |  | US-Mayo | 1.25 | (0.93-1.69) | 1.42E-01 |  |
| rs8102512 | 19 | 36360499 |  | ALL | 1.03 | (0.98-1.07) | 2.35E-01 | 6.04E-03 |
|  |  |  |  |  |  |  |  |  |
| rs7988209 | 13 | 35570942 | DCLK1 | Gliomascan | 1.18 | (1.08-1.29) | 2.51E-04 |  |
| rs7988209 | 13 | 35570942 | DCLK1 | FRE | 0.87 | (0.77-0.97) | 3.23E-02 |  |
| rs7988209 | 13 | 35570942 | DCLK1 | GER | 1.08 | (0.95-1.23) | 4.35E-01 |  |
| rs7988209 | 13 | 35570942 | DCLK1 | US-MDA | 0.99 | (0.90-1.10) | 8.11E-01 |  |
| rs7988209 | 13 | 35570942 | DCLK1 | UK | 0.98 | (0.86-1.11) | 7.71E-01 |  |
| rs7988209 | 13 | 35570942 | DCLK1 | US-UCSF | 1.01 | (0.89-1.14) | 8.85E-01 |  |
| rs7988209 | 13 | 35570942 | DCLK1 | US-Mayo | 0.96 | (0.69-1.34) | 8.18E-01 |  |
| rs7988209 | 13 | 35570942 | DCLK1 | ALL | 1.03 | (0.98-1.07) | 2.55E-01 | 3.46E-03 |
|  |  |  |  |  |  |  |  |  |
| rs11789656 | 9 | 137145299 | OLFM1 | Gliomascan | 1.28 | (1.14-1.42) | 1.50E-05 |  |
| rs11789656 | 9 | 137145299 | OLFM1 | FRE | 1.01 | (0.88-1.16) | 7.93E-01 |  |
| rs11789656 | 9 | 137145299 | OLFM1 | GER | 0.9 | (0.77-1.05) | 2.42E-01 |  |
| rs11789656 | 9 | 137145299 | OLFM1 | US-MDA | 0.88 | (0.78-1.00) | 4.55E-02 |  |
| rs11789656 | 9 | 137145299 | OLFM1 | UK | 0.97 | (0.83-1.14) | 7.12E-01 |  |
| rs11789656 | 9 | 137145299 | OLFM1 | US-UCSF | 1.05 | (0.91-1.21) | 5.14E-01 |  |
| rs11789656 | 9 | 137145299 | OLFM1 | US-Mayo | 0.95 | (0.64-1.40) | 7.87E-01 |  |
| rs11789656 | 9 | 137145299 | OLFM1 | ALL | 1.03 | (0.97-1.09) | 3.08E-01 | 5.65E-04 |
|  |  |  |  |  |  |  |  |  |
| rs13292946 | 9 | 137148376 | OLFM1 | Gliomascan | 1.42 | (1.20-1.67) | 3.40E-05 |  |
| rs13292946 | 9 | 137148376 | OLFM1 | FRE | 0.98 | (0.80-1.20) | 9.11E-01 |  |
| rs13292946 | 9 | 137148376 | OLFM1 | GER | 0.92 | (0.72-1.16) | 4.60E-01 |  |
| rs13292946 | 9 | 137148376 | OLFM1 | US-MDA | 0.9 | (0.74-1.10) | 5.34E-01 |  |
| rs13292946 | 9 | 137148376 | OLFM1 | UK | 0.89 | (0.69-1.16) | 3.75E-01 |  |
| rs13292946 | 9 | 137148376 | OLFM1 | US-Mayo | 0.82 | (0.48-1.43) | 4.91E-01 |  |
| rs13292946 | 9 | 137148376 | OLFM1 | ALL | 1.05 | (0.96-1.15) | 3.22E-01 | 1.99E-03 |
|  |  |  |  |  |  |  |  |  |
| rs1669430 | 12 | 11240129 | PS5,TAS2R42 | Gliomascan | 0.77 | (0.68-0.87) | 4.95E-05 |  |
| rs1669430 | 12 | 11240129 | PS5,TAS2R42 | FRE | 1.04 | (0.90-1.20) | 4.65E-01 |  |
| rs1669430 | 12 | 11240129 | PS5,TAS2R42 | GER | 1.03 | (0.87-1.22) | 5.28E-01 |  |
| rs1669430 | 12 | 11240129 | PS5,TAS2R42 | US-MDA | 1.03 | (0.90-1.18) | 8.33E-01 |  |
| rs1669430 | 12 | 11240129 | PS5,TAS2R42 | UK | 1.11 | (0.94-1.30) | 2.27E-01 |  |
| rs1669430 | 12 | 11240129 | PS5,TAS2R42 | US-UCSF | 1.03 | (0.88-1.21) | 6.74E-01 |  |
| rs1669430 | 12 | 11240129 | PS5,TAS2R42 | US-Mayo | 0.88 | (0.59-1.32) | 5.45E-01 |  |
| rs1669430 | 12 | 11240129 | PS5,TAS2R42 | ALL | 0.97 | (0.92-1.03) | 3.68E-01 | 5.90E-03 |
|  |  |  |  |  |  |  |  |  |
| rs2064012 | 3 | 60744420 | FHIT | Gliomascan | 1.17 | (1.07-1.27) | 3.13E-04 |  |
| rs2064012 | 3 | 60744420 | FHIT | FRE | 0.99 | (0.89-1.10) | 6.72E-01 |  |
| rs2064012 | 3 | 60744420 | FHIT | GER | 1.02 | (0.90-1.15) | 4.47E-01 |  |
| rs2064012 | 3 | 60744420 | FHIT | US-MDA | 0.94 | (0.85-1.03) | 1.60E-01 |  |
| rs2064012 | 3 | 60744420 | FHIT | UK | 1.05 | (0.93-1.19) | 3.43E-01 |  |
| rs2064012 | 3 | 60744420 | FHIT | US-UCSF | 0.91 | (0.82-1.03) | 1.26E-01 |  |
| rs2064012 | 3 | 60744420 | FHIT | US-Mayo | 0.93 | (0.68-1.27) | 6.51E-01 |  |
| rs2064012 | 3 | 60744420 | FHIT | ALL | 1.02 | (0.98-1.06) | 3.72E-01 | 8.41E-03 |
|  |  |  |  |  |  |  |  |  |
| rs10152918 | 15 | 88152578 | ANPEP | Gliomascan | 1.18 | (1.08-1.29) | 2.21E-04 |  |
| rs10152918 | 15 | 88152578 | ANPEP | FRE | 1.01 | (0.90-1.13) | 8.43E-01 |  |
| rs10152918 | 15 | 88152578 | ANPEP | GER | 0.84 | (0.74-0.95) | 1.80E-02 |  |
| rs10152918 | 15 | 88152578 | ANPEP | US-MDA | 0.93 | (0.84-1.03) | 9.31E-02 |  |
| rs10152918 | 15 | 88152578 | ANPEP | UK | 1.03 | (0.91-1.17) | 6.06E-01 |  |
| rs10152918 | 15 | 88152578 | ANPEP | US-UCSF | 1.04 | (0.93-1.17) | 4.64E-01 |  |
| rs10152918 | 15 | 88152578 | ANPEP | US-Mayo | 1.06 | (0.77-1.46) | 7.14E-01 |  |
| rs10152918 | 15 | 88152578 | ANPEP | ALL | 1.02 | (0.98-1.06) | 4.02E-01 | 7.92E-04 |
|  |  |  |  |  |  |  |  |  |
| rs9816926 | 3 | 113004948 | PLCXD2 | Gliomascan | 1.2 | (1.09-1.31) | 1.78E-04 |  |
| rs9816926 | 3 | 113004948 | PLCXD2 | FRE | 0.93 | (0.83-1.05) | 2.28E-01 |  |
| rs9816926 | 3 | 113004948 | PLCXD2 | GER | 0.95 | (0.83-1.08) | 6.06E-01 |  |
| rs9816926 | 3 | 113004948 | PLCXD2 | US-MDA | 0.97 | (0.87-1.08) | 4.19E-01 |  |
| rs9816926 | 3 | 113004948 | PLCXD2 | UK | 0.98 | (0.85-1.12) | 7.57E-01 |  |
| rs9816926 | 3 | 113004948 | PLCXD2 | US-Mayo | 0.87 | (0.63-1.21) | 4.16E-01 |  |
| rs9816926 | 3 | 113004948 | PLCXD2 | ALL | 1.02 | (0.97-1.07) | 4.92E-01 | 5.08E-03 |
|  |  |  |  |  |  |  |  |  |
| rs11856084 | 15 | 75537465 | HMG20A | Gliomascan | 1.24 | (1.12-1.38) | 5.07E-05 |  |
| rs11856084 | 15 | 75537465 | HMG20A | FRE | 0.99 | (0.88-1.12) | 9.19E-01 |  |
| rs11856084 | 15 | 75537465 | HMG20A | GER | 1.04 | (0.91-1.19) | 7.19E-01 |  |
| rs11856084 | 15 | 75537465 | HMG20A | US-MDA | 0.87 | (0.78-0.97) | 6.68E-03 |  |
| rs11856084 | 15 | 75537465 | HMG20A | UK | 0.94 | (0.82-1.08) | 3.73E-01 |  |
| rs11856084 | 15 | 75537465 | HMG20A | US-Mayo | 0.95 | (0.67-1.35) | 7.83E-01 |  |
| rs11856084 | 15 | 75537465 | HMG20A | ALL | 1.02 | (0.97-1.07) | 5.00E-01 | 3.21E-04 |
|  |  |  |  |  |  |  |  |  |
| rs8030470 | 15 | 23771220 | LOC100128714 | Gliomascan | 0.83 | (0.76-0.91) | 7.59E-05 |  |
| rs8030470 | 15 | 23771220 | LOC100128714 | FRE | 1.07 | (0.95-1.20) | 1.43E-01 |  |
| rs8030470 | 15 | 23771220 | LOC100128714 | GER | 0.95 | (0.83-1.07) | 2.52E-01 |  |
| rs8030470 | 15 | 23771220 | LOC100128714 | US-MDA | 1.08 | (0.98-1.20) | 9.30E-02 |  |
| rs8030470 | 15 | 23771220 | LOC100128714 | UK | 1.1 | (0.97-1.24) | 1.70E-01 |  |
| rs8030470 | 15 | 23771220 | LOC100128714 | US-Mayo | 1 | (0.73-1.38) | 9.90E-01 |  |
| rs8030470 | 15 | 23771220 | LOC100128714 | ALL | 0.98 | (0.94-1.03) | 5.33E-01 | 5.61E-04 |
|  |  |  |  |  |  |  |  |  |
| rs604000 | 13 | 97580857 | FARP1 | Gliomascan | 1.18 | (1.08-1.29) | 1.94E-04 |  |
| rs604000 | 13 | 97580857 | FARP1 | FRE | 0.98 | (0.88-1.10) | 7.91E-01 |  |
| rs604000 | 13 | 97580857 | FARP1 | GER | 0.98 | (0.87-1.11) | 5.54E-01 |  |
| rs604000 | 13 | 97580857 | FARP1 | US-MDA | 0.95 | (0.86-1.05) | 1.69E-01 |  |
| rs604000 | 13 | 97580857 | FARP1 | UK | 0.95 | (0.84-1.07) | 3.81E-01 |  |
| rs604000 | 13 | 97580857 | FARP1 | US-UCSF | 0.82 | (0.73-0.92) | 6.98E-04 |  |
| rs604000 | 13 | 97580857 | FARP1 | US-Mayo | 1.24 | (0.91-1.69) | 1.79E-01 |  |
| rs604000 | 13 | 97580857 | FARP1 | ALL | 1 | (0.95-1.04) | 8.41E-01 | 6.24E-05 |
|  |  |  |  |  |  |  |  |  |
| rs7144652 | 14 | 54607471 | MAPK1IP1L | Gliomascan | 1.19 | (1.09-1.30) | 8.31E-05 |  |
| rs7144652 | 14 | 54607471 | MAPK1IP1L | FRE | 0.92 | (0.82-1.03) | 1.16E-01 |  |
| rs7144652 | 14 | 54607471 | MAPK1IP1L | GER | 1.04 | (0.92-1.18) | 1.67E-01 |  |
| rs7144652 | 14 | 54607471 | MAPK1IP1L | US-MDA | 0.94 | (0.85-1.03) | 2.52E-01 |  |
| rs7144652 | 14 | 54607471 | MAPK1IP1L | UK | 0.97 | (0.85-1.09) | 5.81E-01 |  |
| rs7144652 | 14 | 54607471 | MAPK1IP1L | US-UCSF | 0.87 | (0.78-0.98) | 2.24E-02 |  |
| rs7144652 | 14 | 54607471 | MAPK1IP1L | US-Mayo | 0.82 | (0.61-1.11) | 1.92E-01 |  |
| rs7144652 | 14 | 54607471 | MAPK1IP1L | ALL | 1 | (0.95-1.04) | 8.62E-01 | 1.48E-04 |
|  |  |  |  |  |  |  |  |  |
| rs3742970 | 15 | 41409557 | LCMT2,ADAL | Gliomascan | 0.73 | (0.62-0.86) | 1.34E-04 |  |
| rs3742970 | 15 | 41409557 | LCMT2,ADAL | FRE | 1.03 | (0.86-1.23) | 6.25E-01 |  |
| rs3742970 | 15 | 41409557 | LCMT2,ADAL | GER | 1.23 | (0.98-1.55) | 1.18E-01 |  |
| rs3742970 | 15 | 41409557 | LCMT2,ADAL | US-MDA | 0.98 | (0.82-1.16) | 6.44E-01 |  |
| rs3742970 | 15 | 41409557 | LCMT2,ADAL | UK | 0.96 | (0.78-1.20) | 6.70E-01 |  |
| rs3742970 | 15 | 41409557 | LCMT2,ADAL | US-UCSF | 1.3 | (1.07-1.57) | 7.52E-03 |  |
| rs3742970 | 15 | 41409557 | LCMT2,ADAL | US-Mayo | 1.08 | (0.61-1.91) | 7.94E-01 |  |
| rs3742970 | 15 | 41409557 | LCMT2,ADAL | ALL | 0.99 | (0.92-1.07) | 8.65E-01 | 3.00E-04 |
|  |  |  |  |  |  |  |  |  |
| rs4912537 | 3 | 185521663 | EIF4G1,SNORD66,FAM131A | Gliomascan | 1.21 | (1.10-1.34) | 1.75E-04 |  |
| rs4912537 | 3 | 185521663 | EIF4G1,SNORD66,FAM131A | FRE | 0.93 | (0.82-1.06) | 1.81E-01 |  |
| rs4912537 | 3 | 185521663 | EIF4G1,SNORD66,FAM131A | GER | 0.9 | (0.78-1.04) | 7.57E-01 |  |
| rs4912537 | 3 | 185521663 | EIF4G1,SNORD66,FAM131A | US-MDA | 0.92 | (0.82-1.03) | 4.47E-01 |  |
| rs4912537 | 3 | 185521663 | EIF4G1,SNORD66,FAM131A | UK | 0.91 | (0.79-1.06) | 2.31E-01 |  |
| rs4912537 | 3 | 185521663 | EIF4G1,SNORD66,FAM131A | US-Mayo | 1.05 | (0.73-1.51) | 7.95E-01 |  |
| rs4912537 | 3 | 185521663 | EIF4G1,SNORD66,FAM131A | ALL | 1 | (0.94-1.05) | 9.40E-01 | 8.47E-04 |
|  |  |  |  |  |  |  |  |  |
| rs9881879 | 3 | 156358614 | MME | Gliomascan | 0.84 | (0.76-0.92) | 1.92E-04 |  |
| rs9881879 | 3 | 156358614 | MME | FRE | 1.1 | (0.98-1.25) | 1.08E-01 |  |
| rs9881879 | 3 | 156358614 | MME | GER | 1.18 | (1.02-1.35) | 2.83E-02 |  |
| rs9881879 | 3 | 156358614 | MME | US-MDA | 1.04 | (0.93-1.16) | 8.48E-01 |  |
| rs9881879 | 3 | 156358614 | MME | UK | 0.94 | (0.83-1.08) | 4.13E-01 |  |
| rs9881879 | 3 | 156358614 | MME | US-UCSF | 1.09 | (0.96-1.24) | 1.59E-01 |  |
| rs9881879 | 3 | 156358614 | MME | US-Mayo | 0.9 | (0.64-1.28) | 5.62E-01 |  |
| rs9881879 | 3 | 156358614 | MME | ALL | 1 | (0.95-1.05) | 9.66E-01 | 3.01E-04 |
|  |  |  |  |  |  |  |  |  |
| rs3742569 | 14 | 54888459 | FBXO34 | Gliomascan | 1.2 | (1.10-1.31) | 2.73E-05 |  |
| rs3742569 | 14 | 54888459 | FBXO34 | FRE | 0.92 | (0.83-1.04) | 1.25E-01 |  |
| rs3742569 | 14 | 54888459 | FBXO34 | GER | 1.04 | (0.92-1.17) | 3.39E-01 |  |
| rs3742569 | 14 | 54888459 | FBXO34 | US-MDA | 0.95 | (0.86-1.05) | 1.69E-01 |  |
| rs3742569 | 14 | 54888459 | FBXO34 | UK | 0.93 | (0.82-1.05) | 2.74E-01 |  |
| rs3742569 | 14 | 54888459 | FBXO34 | US-UCSF | 0.88 | (0.78-0.99) | 2.62E-02 |  |
| rs3742569 | 14 | 54888459 | FBXO34 | US-Mayo | 0.9 | (0.67-1.23) | 5.16E-01 |  |
| rs3742569 | 14 | 54888459 | FBXO34 | ALL | 1 | (0.96-1.05) | 9.66E-01 | 1.30E-04 |

**Supplementary Table 3. Meta-Analysis Risk Estimates for Glioma for 85 loci identified in Combined Data from UK, US-MDA, French and German replication groups.**

| SNP | CHR | LOCATION | GENE | Fixed OR | Fixed Pvalue | Random OR | Random Pvalue | Q stat |
| --- | --- | --- | --- | --- | --- | --- | --- | --- |
| rs10842952 | 12 | 27659180 | PPFIBP1 | 1.14 | 5.07E-07 | 1.11 | 2.58E-02 | 25.36 |
| rs11971309 | 7 | 136362695 |  | 1.12 | 5.44E-06 | 1.12 | 5.44E-06 | 5.52 |
| rs6069900 | 20 | 54831367 |  | 0.90 | 5.73E-06 | 0.90 | 5.73E-06 | 4.56 |
| rs11123312 | 2 | 111512510 | ACOXL | 1.18 | 6.61E-06 | 1.18 | 2.97E-04 | 11.23 |
| rs11128918 | 3 | 1983771 |  | 0.87 | 7.89E-06 | 0.87 | 7.89E-06 | 7.92 |
| rs11240748 | 1 | 202719943 | PIK3C2B,LOC100130573,LOC730254 | 1.12 | 1.74E-05 | 1.12 | 4.72E-05 | 8.54 |
| rs7862315 | 9 | 131658628 | USP20 | 1.18 | 2.29E-05 | 1.17 | 1.81E-02 | 18.34 |
| rs10488631 | 7 | 128381419 | IRF5,TNPO3 | 1.16 | 3.87E-05 | 1.15 | 1.09E-02 | 15.52 |
| rs2072532 | 2 | 40219805 | LOC100128590,SLC8A1 | 0.91 | 4.29E-05 | 0.93 | 5.91E-02 | 17.28 |
| rs995302 | 4 | 163944452 |  | 0.91 | 4.92E-05 | 0.91 | 4.92E-05 | 1.83 |
| rs12351481 | 9 | 4260389 | GLIS3 | 1.10 | 5.01E-05 | 1.10 | 5.01E-05 | 6.73 |
| rs12531711 | 7 | 128404702 | TNPO3 | 1.16 | 5.48E-05 | 1.15 | 1.18E-02 | 15.37 |
| rs3759589 | 14 | 50122718 | ATL1,SNRPGP | 1.10 | 6.36E-05 | 1.09 | 2.41E-02 | 16.27 |
| rs709829 | 8 | 12934748 | C8orf79 | 1.17 | 7.67E-05 | 1.17 | 7.67E-05 | 7.02 |
| rs4723581 | 7 | 36836753 |  | 1.10 | 8.44E-05 | 1.10 | 8.44E-05 | 8.00 |
| rs759415 | 7 | 36838240 |  | 1.10 | 9.08E-05 | 1.10 | 9.08E-05 | 7.71 |
| rs1498017 | 4 | 125872448 |  | 1.11 | 1.09E-04 | 1.11 | 1.09E-04 | 5.65 |
| rs17005939 | 3 | 1979251 |  | 0.91 | 1.55E-04 | 0.91 | 1.93E-03 | 10.94 |
| rs10519311 | 15 | 64018475 | MEGF11 | 1.12 | 1.59E-04 | 1.12 | 1.79E-02 | 16.59 |
| rs4796305 | 17 | 7276779 | C17orf74,TMEM102,FGF11,CHRNB1 | 1.16 | 1.74E-04 | 1.15 | 1.11E-02 | 12.78 |
| rs2305252 | 15 | 25940933 | OCA2 | 1.11 | 1.81E-04 | 1.07 | 2.87E-01 | 41.11 |
| rs16891725 | 6 | 26587129 | BTN2A1 | 0.87 | 2.31E-04 | 0.88 | 4.29E-02 | 18.33 |
| rs2072531 | 2 | 40241861 | LOC100128590,SLC8A1 | 0.92 | 2.62E-04 | 0.93 | 3.06E-02 | 13.95 |
| rs10904701 | 10 | 6742604 |  | 0.91 | 2.76E-04 | 0.92 | 6.97E-03 | 11.29 |
| rs17530357 | 4 | 41761068 | SLC30A9 | 0.87 | 2.93E-04 | 0.88 | 2.35E-03 | 9.60 |
| rs9306960 | 4 | 37964118 |  | 1.10 | 3.18E-04 | 1.09 | 4.09E-02 | 16.88 |
| rs2635351 | 4 | 118700853 |  | 1.09 | 3.51E-04 | 1.08 | 1.41E-02 | 12.17 |
| rs6864438 | 5 | 161410501 | GABRG2 | 1.12 | 4.07E-04 | 1.10 | 2.77E-02 | 13.93 |
| rs1395813 | 18 | 71869875 |  | 1.12 | 4.07E-04 | 1.12 | 2.61E-03 | 9.54 |
| rs9959776 | 18 | 71842016 |  | 1.09 | 4.17E-04 | 1.05 | 2.56E-01 | 22.76 |
| rs4918769 | 10 | 114527121 | VTI1A | 1.10 | 4.42E-04 | 1.09 | 7.16E-02 | 23.32 |
| rs10872856 | 14 | 20356515 | RNASE1 | 1.17 | 5.61E-04 | 1.13 | 1.00E-01 | 17.77 |
| rs2659186 | 5 | 173188086 |  | 0.92 | 6.15E-04 | 0.92 | 6.43E-04 | 8.03 |
| rs3851634 | 12 | 105337032 | POLR3B | 0.91 | 6.41E-04 | 0.94 | 1.26E-01 | 16.82 |
| rs7999200 | 13 | 23538701 |  | 0.92 | 7.61E-04 | 0.94 | 1.55E-01 | 21.53 |
| rs409620 | 2 | 40231848 | LOC100128590,SLC8A1 | 1.08 | 8.21E-04 | 1.07 | 2.78E-02 | 12.44 |
| rs2077190 | 11 | 56704104 | LRRC55 | 1.10 | 9.33E-04 | 1.08 | 1.20E-01 | 20.67 |
| rs6869535 | 5 | 40633375 |  | 0.90 | 1.04E-03 | 0.91 | 4.87E-02 | 16.23 |
| rs9901643 | 17 | 7360548 | POLR2A | 1.11 | 1.07E-03 | 1.09 | 1.50E-01 | 21.19 |
| rs10885375 | 10 | 114465179 | VTI1A | 0.92 | 1.07E-03 | 0.93 | 1.72E-01 | 29.60 |
| rs17018779 | 4 | 92953741 |  | 1.15 | 1.08E-03 | 1.12 | 8.53E-02 | 16.84 |
| rs4674541 | 2 | 221120633 |  | 1.14 | 1.11E-03 | 1.13 | 1.03E-02 | 9.99 |
| rs1419183 | 6 | 28350773 | ZNF187,PGBD1 | 0.89 | 1.21E-03 | 0.90 | 4.53E-02 | 15.29 |
| rs3803414 | 15 | 63993258 | MEGF11 | 1.14 | 1.22E-03 | 1.12 | 6.64E-02 | 15.09 |
| rs12541098 | 8 | 67498936 | RRS1,ADHFE1 | 1.08 | 1.28E-03 | 1.08 | 6.50E-03 | 9.60 |
| rs2461060 | 8 | 80774023 |  | 1.08 | 1.37E-03 | 1.08 | 2.73E-02 | 13.10 |
| rs2635356 | 4 | 118708283 | NT5C3P1 | 0.93 | 1.56E-03 | 0.93 | 4.09E-03 | 8.94 |
| rs12697413 | 5 | 40592084 |  | 0.92 | 1.73E-03 | 0.93 | 3.66E-02 | 12.46 |
| rs4472861 | 10 | 111052421 |  | 1.13 | 1.77E-03 | 1.11 | 2.39E-02 | 11.43 |
| rs17750318 | 5 | 173194190 |  | 1.08 | 2.15E-03 | 1.06 | 5.47E-02 | 13.15 |
| rs2296248 | 13 | 42799050 | ENOX1 | 1.09 | 2.75E-03 | 1.08 | 1.29E-01 | 20.50 |
| rs6893430 | 5 | 40685020 |  | 0.92 | 3.02E-03 | 0.92 | 3.20E-02 | 11.77 |
| rs2036741 | 15 | 54077390 | NEDD4,CNOT6LP1 | 0.93 | 3.32E-03 | 0.94 | 6.11E-02 | 13.19 |
| rs11740657 | 5 | 135609558 | TRPC7 | 0.90 | 3.96E-03 | 0.94 | 3.01E-01 | 19.01 |
| rs7798625 | 7 | 130552056 |  | 1.08 | 4.25E-03 | 1.07 | 7.40E-02 | 13.20 |
| rs11046966 | 12 | 23568959 | SOX5 | 0.93 | 4.25E-03 | 0.94 | 2.34E-02 | 9.86 |
| rs12656448 | 5 | 103007847 |  | 1.07 | 4.91E-03 | 1.06 | 1.74E-01 | 20.41 |
| rs2831453 | 21 | 28362840 |  | 1.07 | 5.39E-03 | 1.06 | 1.21E-01 | 17.17 |
| rs10819112 | 9 | 127883306 |  | 1.07 | 5.83E-03 | 1.05 | 2.52E-01 | 20.96 |
| rs3129963 | 6 | 32488186 | BTNL2 | 0.92 | 6.52E-03 | 0.94 | 2.11E-01 | 16.08 |
| rs2112507 | 19 | 39043615 |  | 1.11 | 6.82E-03 | 1.09 | 9.69E-02 | 14.41 |
| rs475891 | 1 | 242192349 |  | 0.93 | 6.89E-03 | 0.95 | 1.97E-01 | 15.59 |
| rs4732986 | 8 | 29541846 | RPL17P33 | 0.94 | 7.79E-03 | 0.95 | 1.23E-01 | 13.97 |
| rs9643478 | 8 | 54595290 | MAPK6PS1 | 1.07 | 8.08E-03 | 1.06 | 1.62E-01 | 16.79 |
| rs11047726 | 12 | 24995965 | BCAT1 | 1.10 | 9.39E-03 | 1.06 | 2.54E-01 | 16.07 |
| rs2405937 | 18 | 71831598 |  | 0.94 | 9.40E-03 | 0.97 | 3.82E-01 | 19.12 |
| rs2206920 | 20 | 6616179 |  | 1.11 | 1.24E-02 | 1.08 | 3.28E-01 | 25.57 |
| rs1398506 | 17 | 48457037 |  | 0.92 | 1.25E-02 | 0.93 | 2.09E-01 | 22.33 |
| rs6500291 | 16 | 48712314 | LOC100130390 | 0.93 | 1.36E-02 | 0.95 | 2.10E-01 | 14.32 |
| rs753279 | 5 | 140004002 | CD14,TMCO6,NDUFA2,IK | 1.06 | 1.42E-02 | 1.04 | 3.34E-01 | 20.08 |
| rs6096704 | 20 | 50038570 |  | 0.92 | 1.44E-02 | 0.94 | 1.90E-01 | 14.14 |
| rs10498084 | 2 | 221092601 |  | 1.08 | 1.48E-02 | 1.05 | 3.02E-01 | 14.96 |
| rs11979158 | 7 | 55126843 | EGFR | 0.92 | 1.62E-02 | 0.98 | 8.19E-01 | 44.66 |
| rs3211669 | 9 | 91116842 | CKS2,SECISBP2 | 0.92 | 2.16E-02 | 0.94 | 3.00E-01 | 17.60 |
| rs3211703 | 9 | 91122129 | CKS2,SECISBP2 | 0.93 | 2.28E-02 | 0.95 | 2.90E-01 | 15.85 |
| rs759169 | 7 | 55122130 | EGFR | 1.07 | 2.39E-02 | 1.01 | 8.24E-01 | 29.56 |
| rs2252586 | 7 | 54946418 |  | 1.06 | 2.51E-02 | 0.99 | 9.07E-01 | 52.92 |
| rs6969537 | 7 | 55049912 | EGFR | 0.93 | 2.54E-02 | 0.96 | 5.66E-01 | 26.90 |
| rs4537324 | 8 | 6101681 |  | 1.07 | 2.98E-02 | 1.03 | 6.06E-01 | 22.30 |
| rs11107616 | 12 | 76888911 | NAV3 | 1.07 | 3.23E-02 | 1.05 | 3.85E-01 | 17.67 |
| rs1326316 | 13 | 30819004 |  | 1.05 | 4.57E-02 | 1.04 | 4.22E-01 | 25.83 |
| rs3751667 | 16 | 944555 | LMF1,LOC100130051 | 1.06 | 5.22E-02 | 1.01 | 8.80E-01 | 28.82 |
| rs10765874 | 11 | 11587810 | GALNTL4 | 0.94 | 7.60E-02 | 0.97 | 6.37E-01 | 25.53 |
| rs10073340 | 5 | 1374873 | CLPTM1L | 1.05 | 1.16E-01 | 1.00 | 9.69E-01 | 42.22 |
| rs17631074 | 13 | 30800042 | B3GALTL | 1.07 | 1.41E-01 | 1.07 | 2.02E-01 | 11.57 |
